# Supplementary material for: Features of Luminescent Properties of Alginate Aerogels with Rare Earth Elements as Photoactive Cross-Linking Agents
Source: MDPI journal article supplement (doi:10.3390/gels8100617), 2022-09-27
Supplement: s1 [file s1]

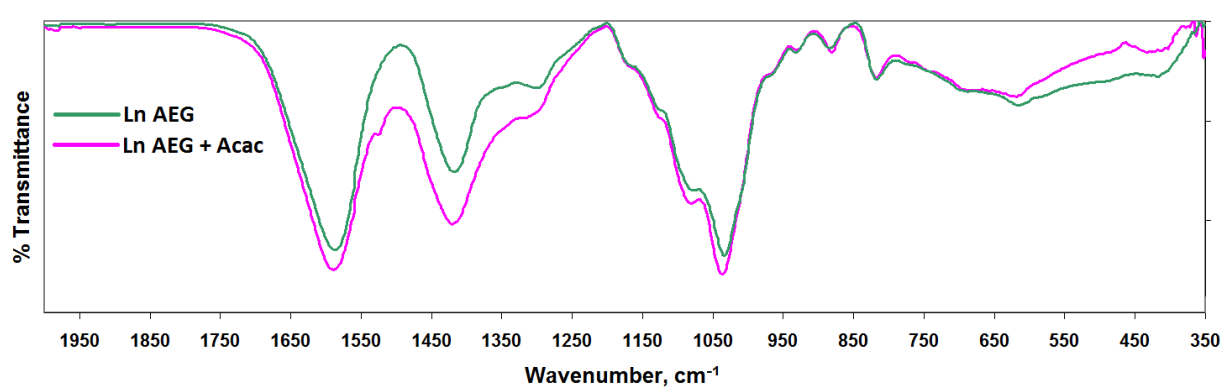

Figure S1. FTIR spectra of initial crosslinked films Ln AEG and SC-impregnated films Ln AEG + Acac.

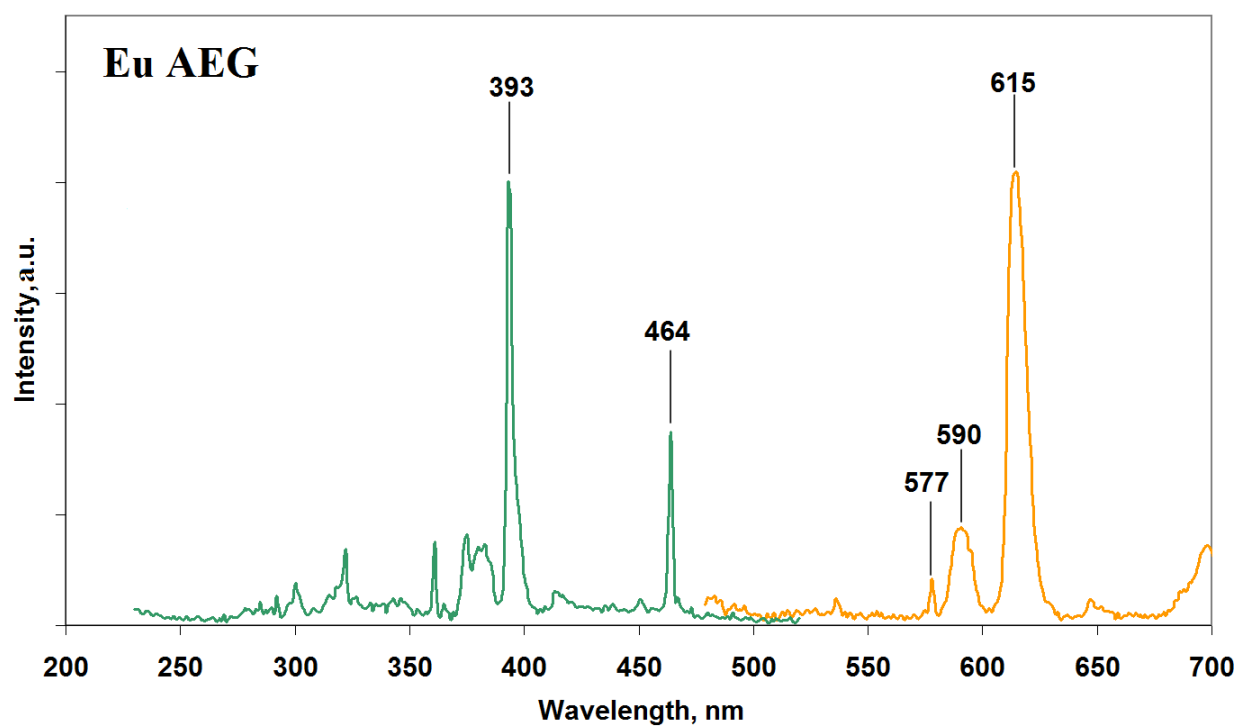

Figure S2. Luminescence spectra (orange curve) and luminescence excitation spectra (green curve) of alginate aerogels crosslinked with Eu<sup>3+</sup>.

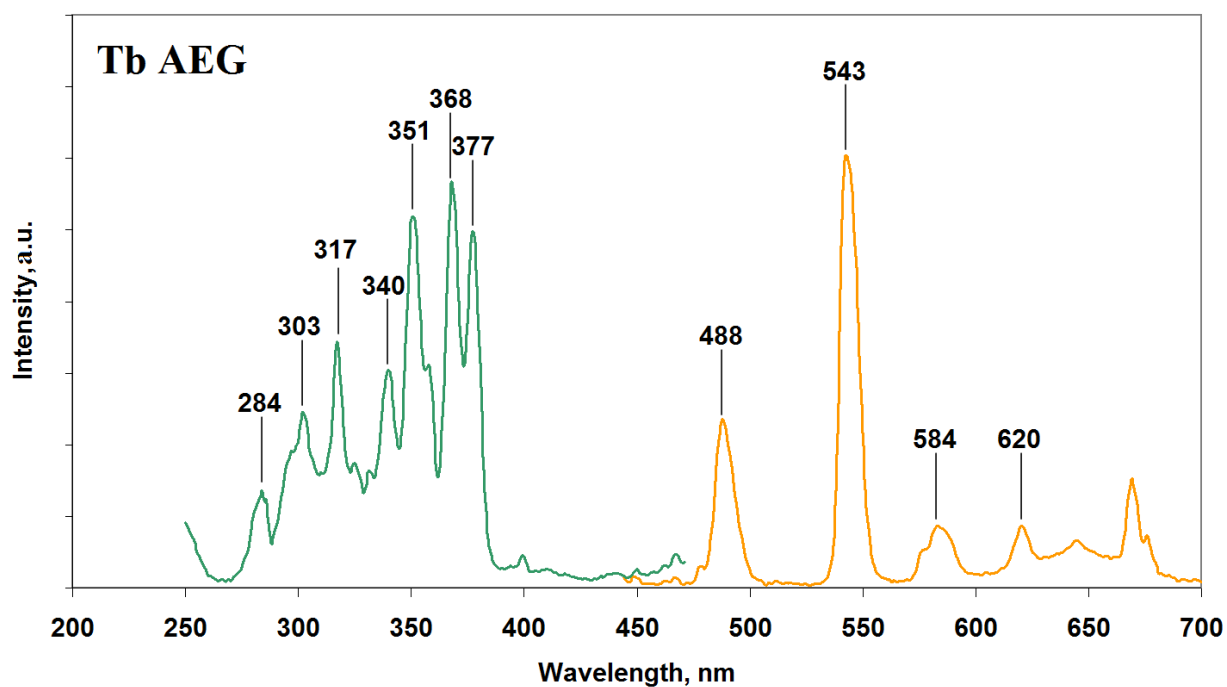

Figure S3. Luminescence spectra (orange curve) and luminescence excitation spectra (green curve) of alginate aerogels crosslinked with Tb<sup>3+</sup>.

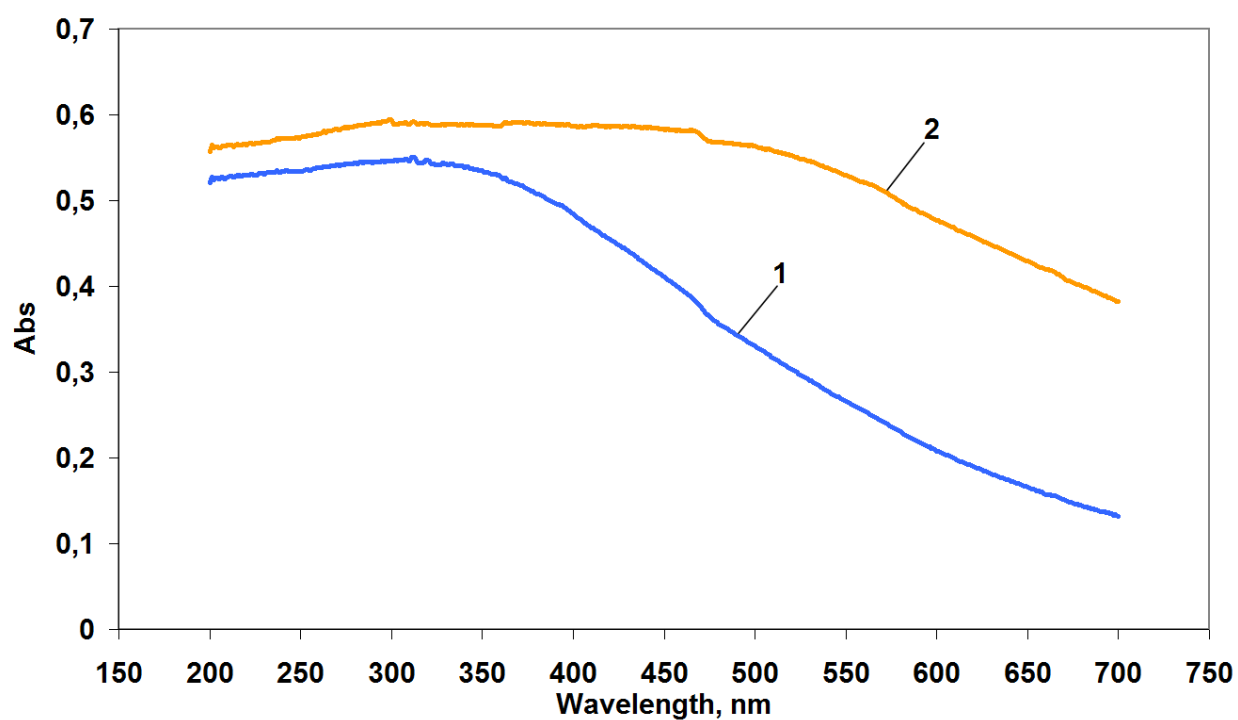

Figure S4. Spectra of Eu AEG (curve 1) and Eu AEG film after SC-impregnation of Phen (curve 2). Film thickness approximately 0,3 mm.

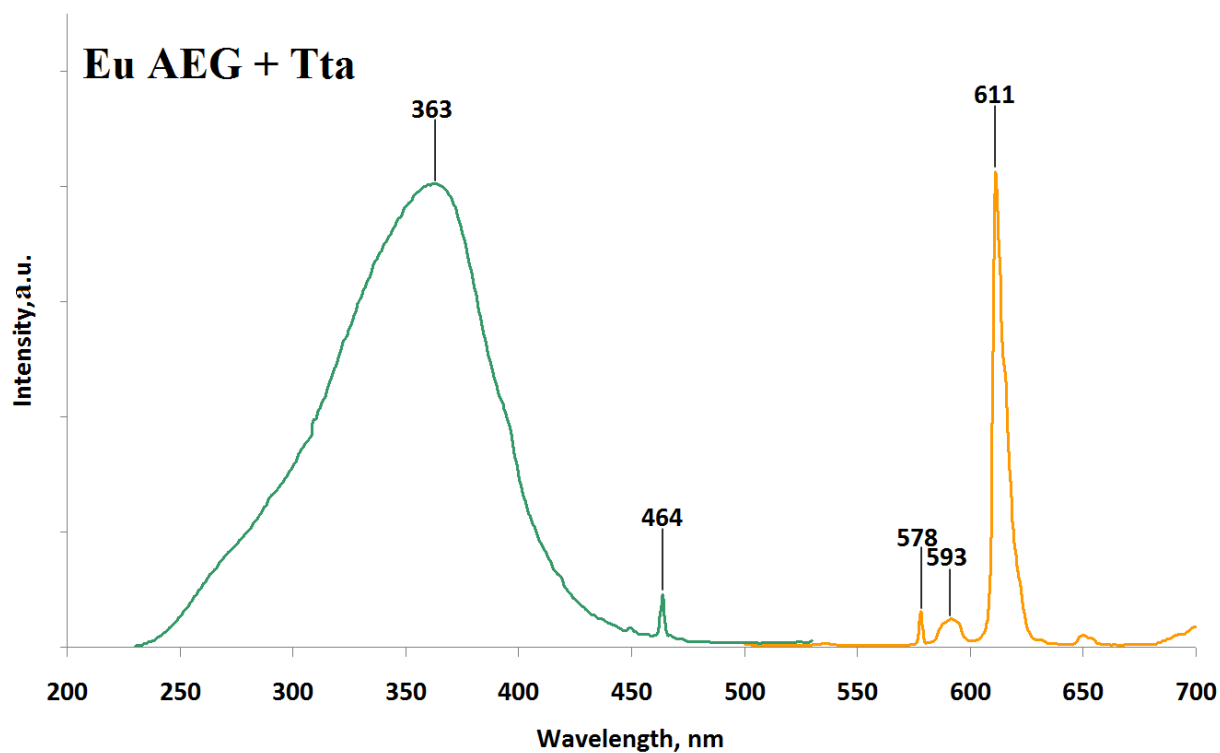

Figure S5. Luminescence (orange curve) and luminescence excitation (green curve) spectra of alginate aerogels crosslinked with  $\text{Eu}^{3+}$  ions, SC-impregnated with Tta ligands.

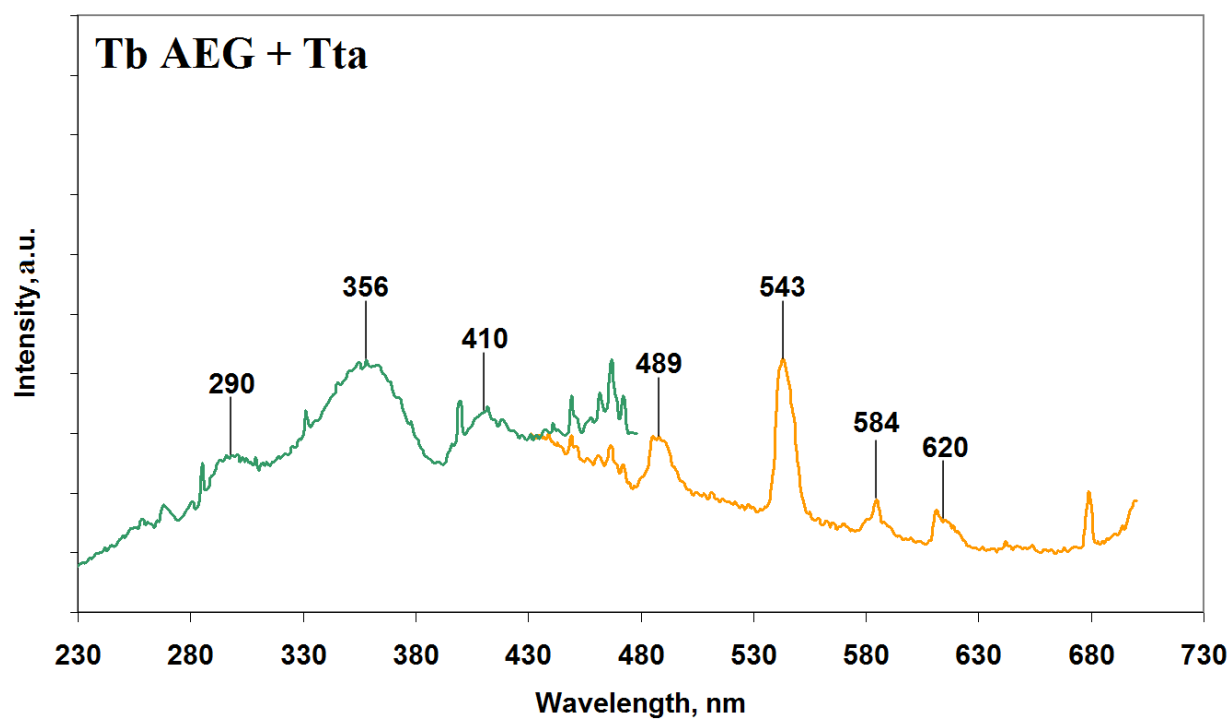

Figure S6. Luminescence (orange curve) and luminescence excitation (green curve) spectra of alginate aerogels crosslinked with  $\text{Tb}^{3+}$  ions, SC-impregnated with Tta ligands.

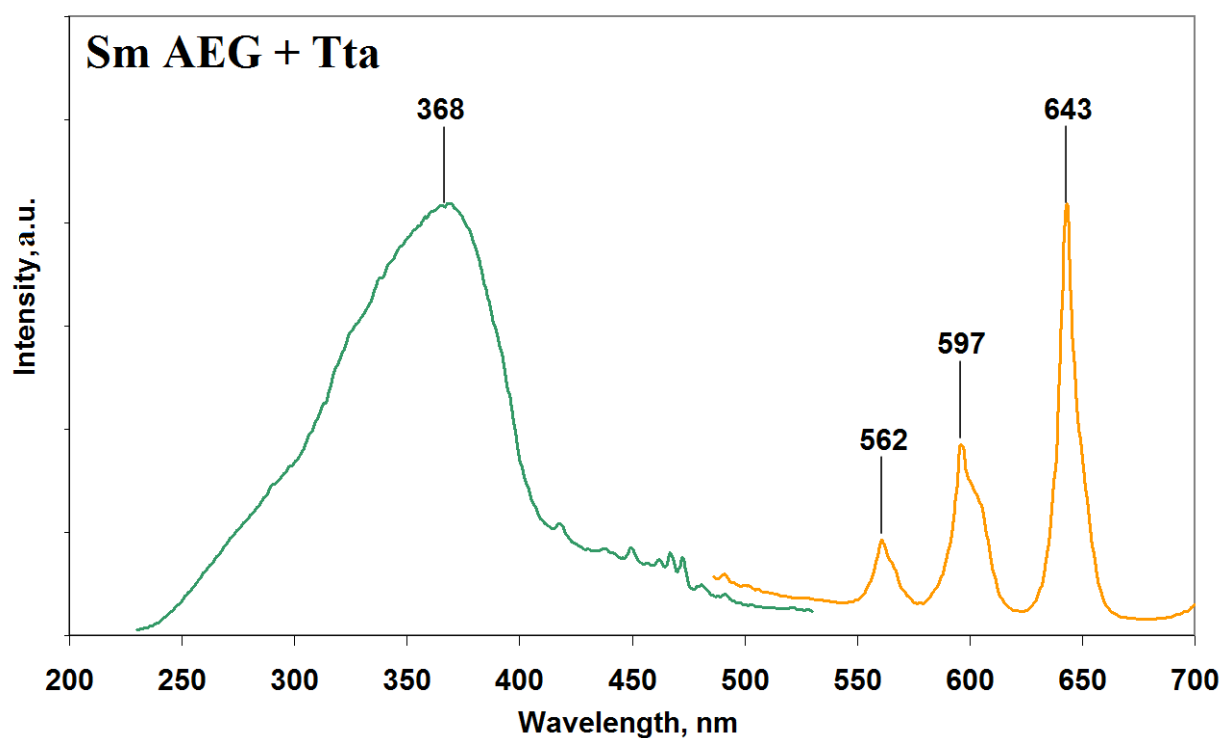

Figure S7. Luminescence (orange curve) and luminescence excitation (green curve) spectra of alginate aerogels crosslinked with  $\text{Sm}^{3+}$  ions, SC-impregnated with Tta ligands.

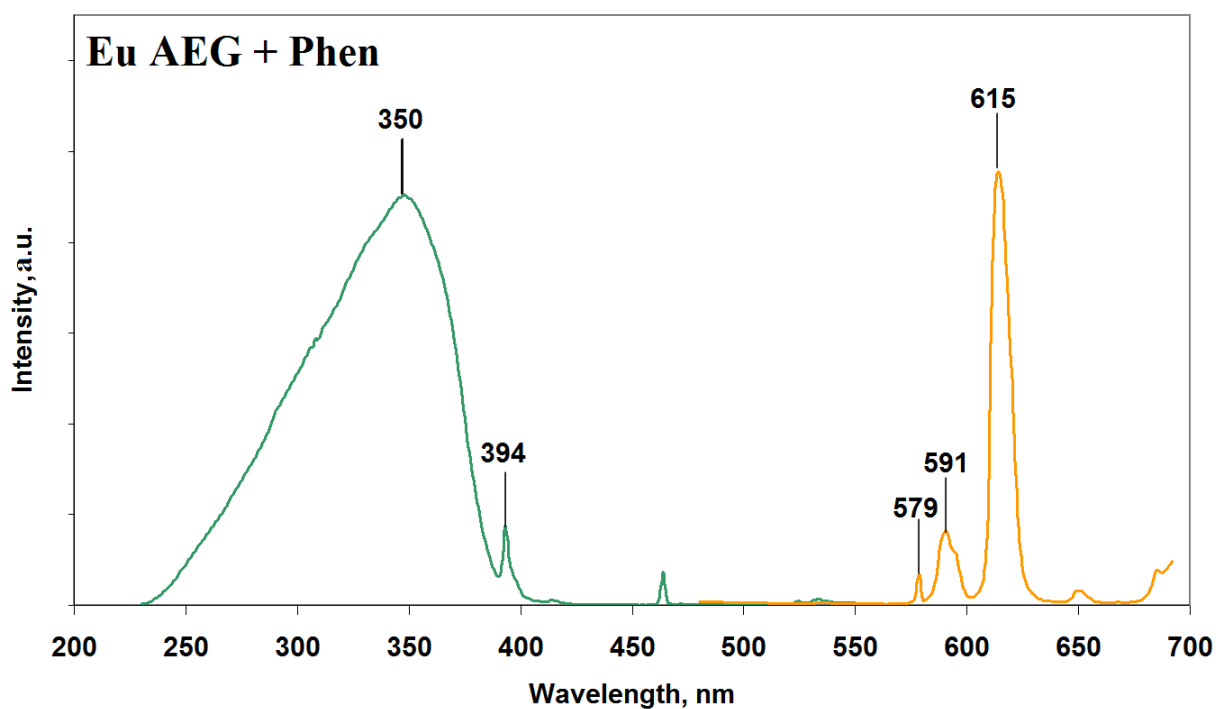

Figure S8. Luminescence (orange curve) and luminescence excitation (green curve) spectra of alginate aerogels crosslinked with  $\text{Eu}^{3+}$  ions, SC-impregnated with Phen ligands.

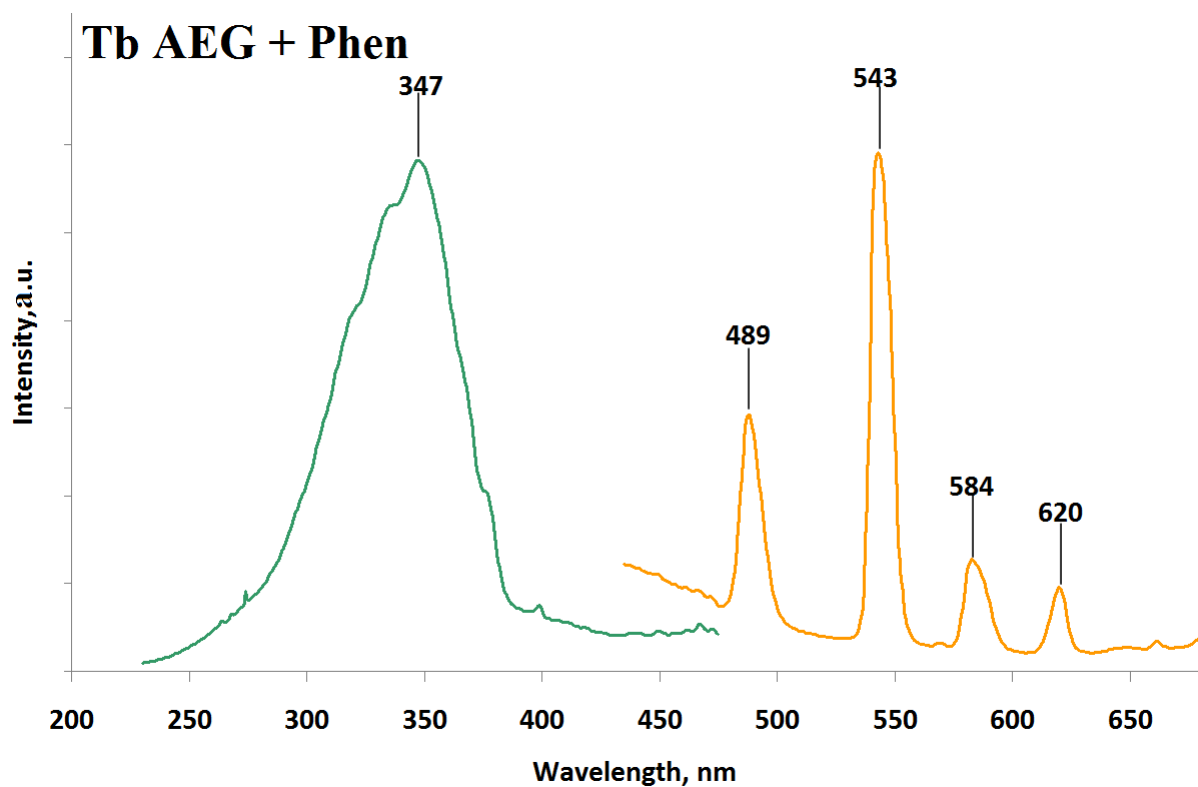

Figure S9. Luminescence (orange curve) and luminescence excitation (green curve) spectra of alginate aerogels crosslinked with  $\text{Tb}^{3+}$  ions, SC-impregnated with Phen ligands.

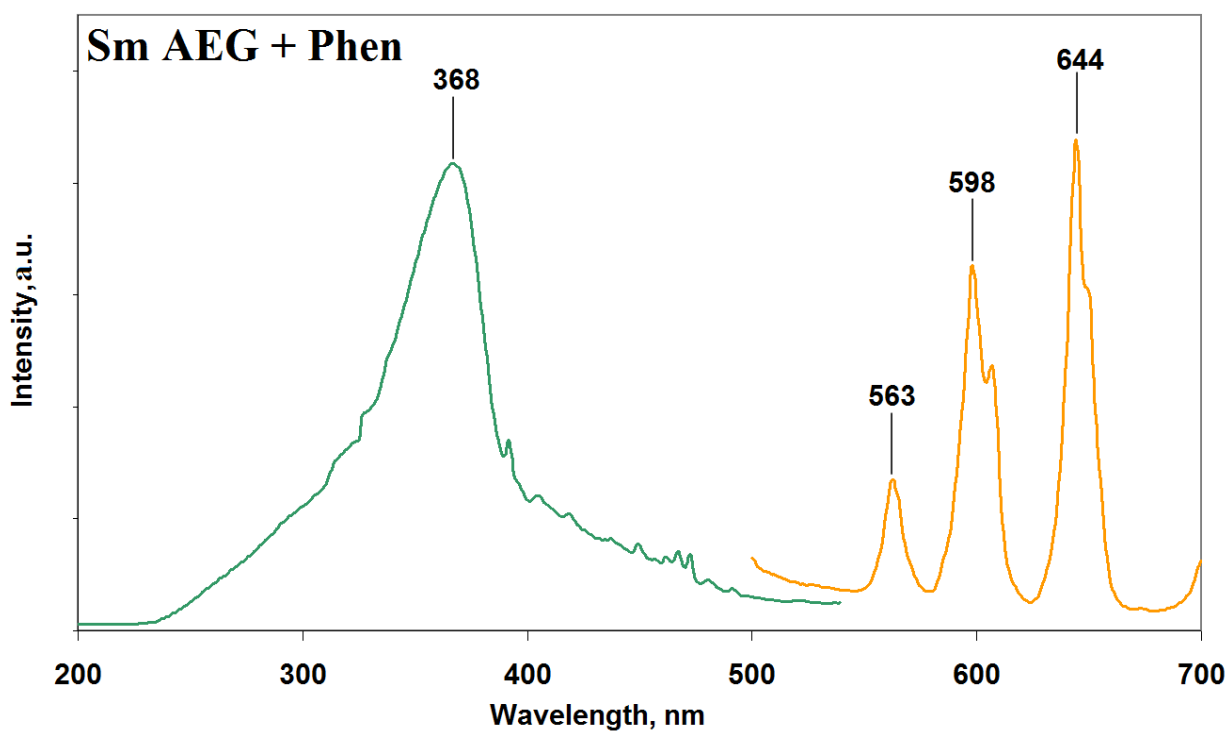

Figure S10. Luminescence (orange curve) and luminescence excitation (green curve) spectra of alginate aerogels crosslinked with  $\text{Sm}^{3+}$  ions, SC-impregnated with Phen ligands.

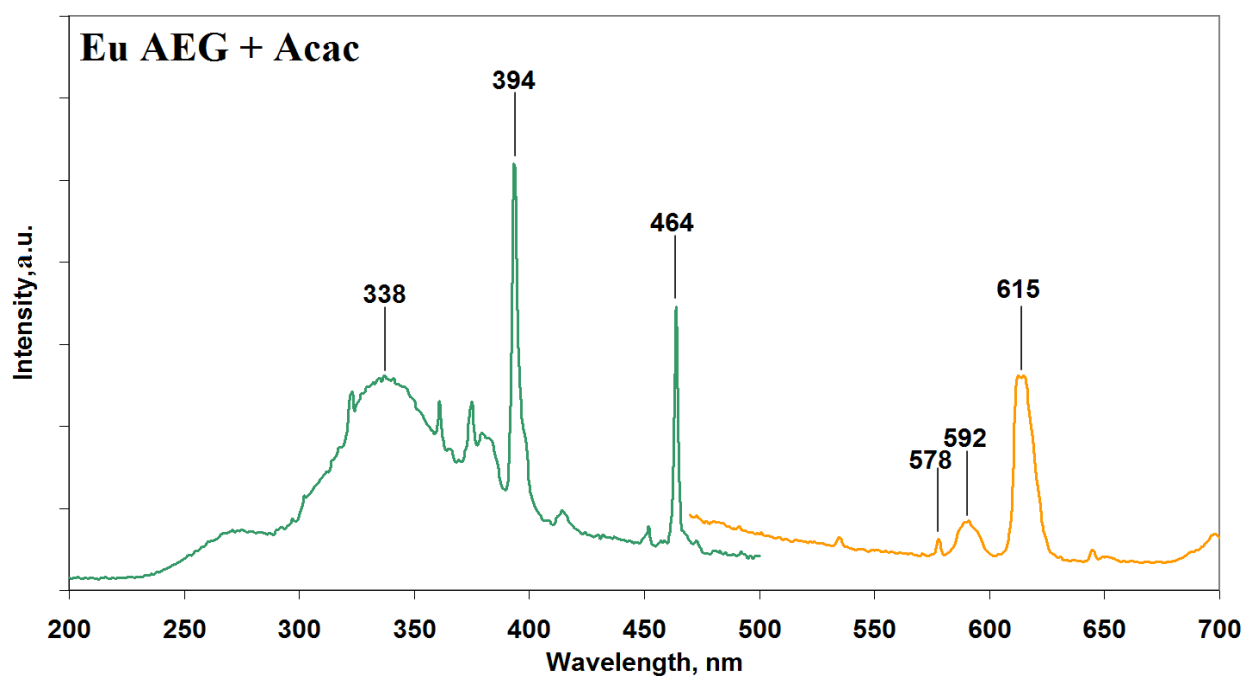

Figure S11. Luminescence (orange curve) and luminescence excitation (green curve) spectra of alginate aerogels crosslinked with  $\text{Eu}^{3+}$  ions, SC-impregnated with Acac ligands.

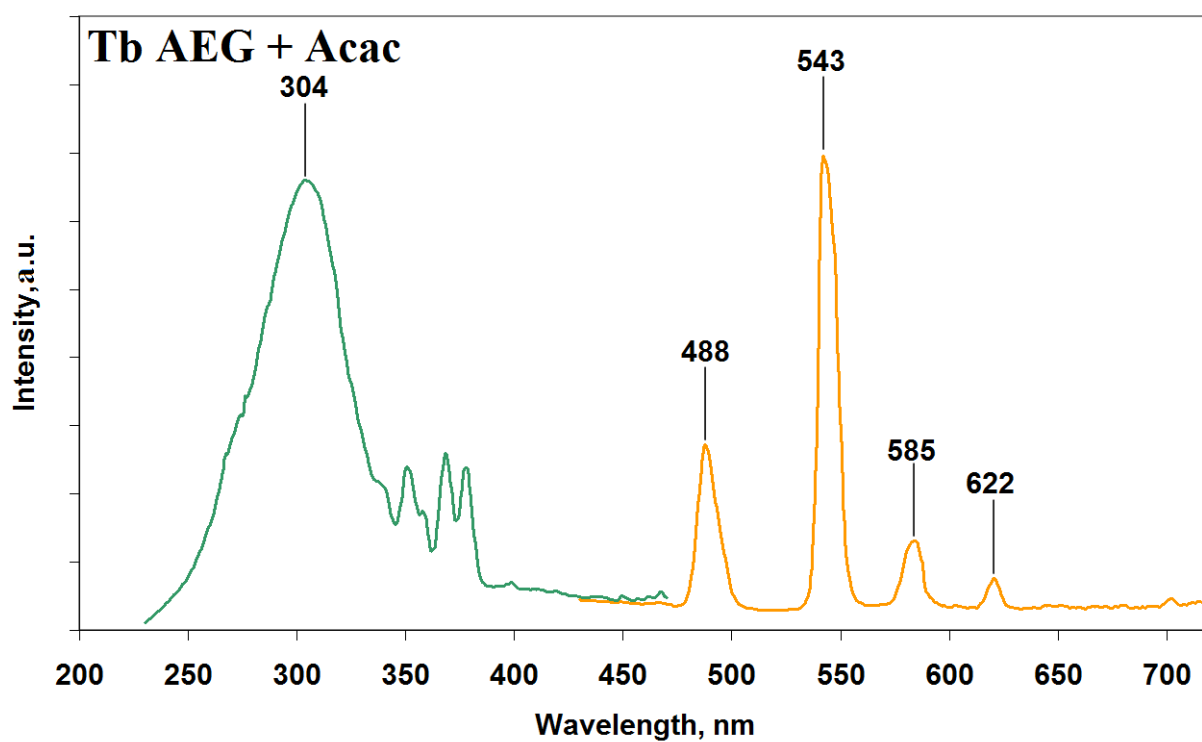

Figure S12. Luminescence (orange curve) and luminescence excitation (green curve) spectra of alginate aerogels crosslinked with  $\text{Tb}^{3+}$  ions, SC-impregnated with Acac ligands.

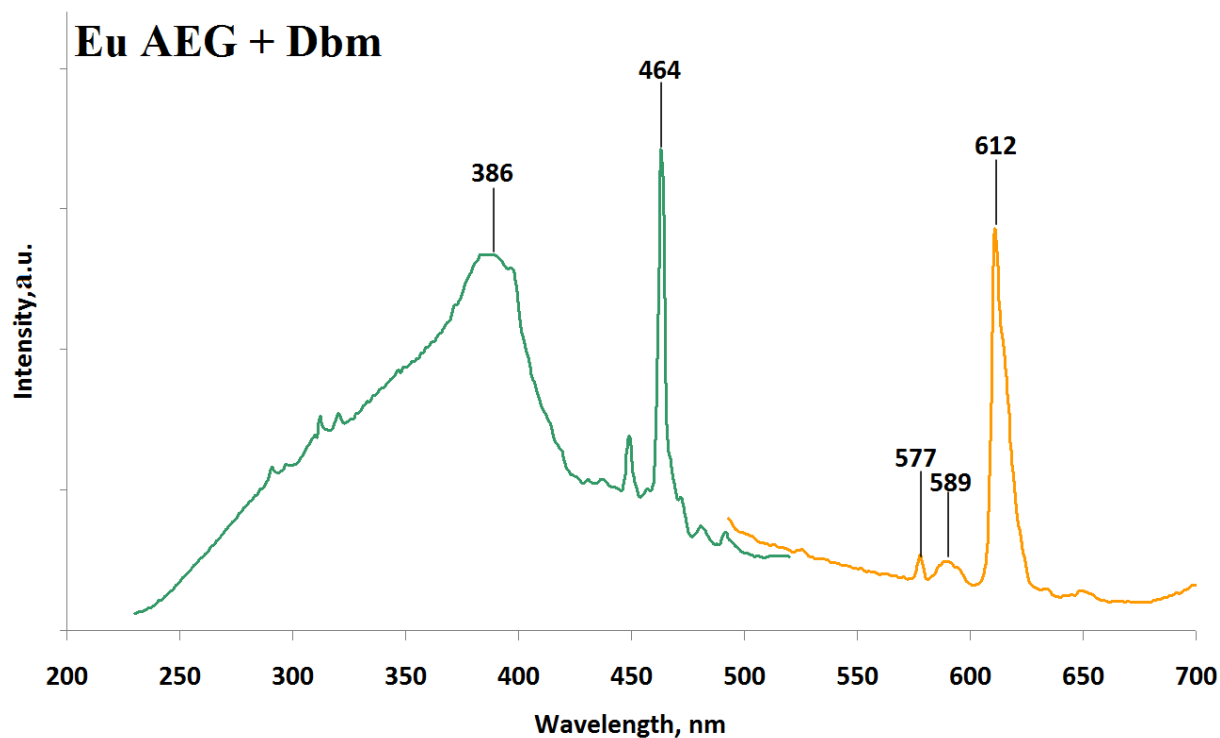

Figure S13. Luminescence (orange curve) and luminescence excitation (green curve) spectra of alginate aerogels crosslinked with  $\text{Eu}^{3+}$  ions, SC-impregnated with Dbm ligands.

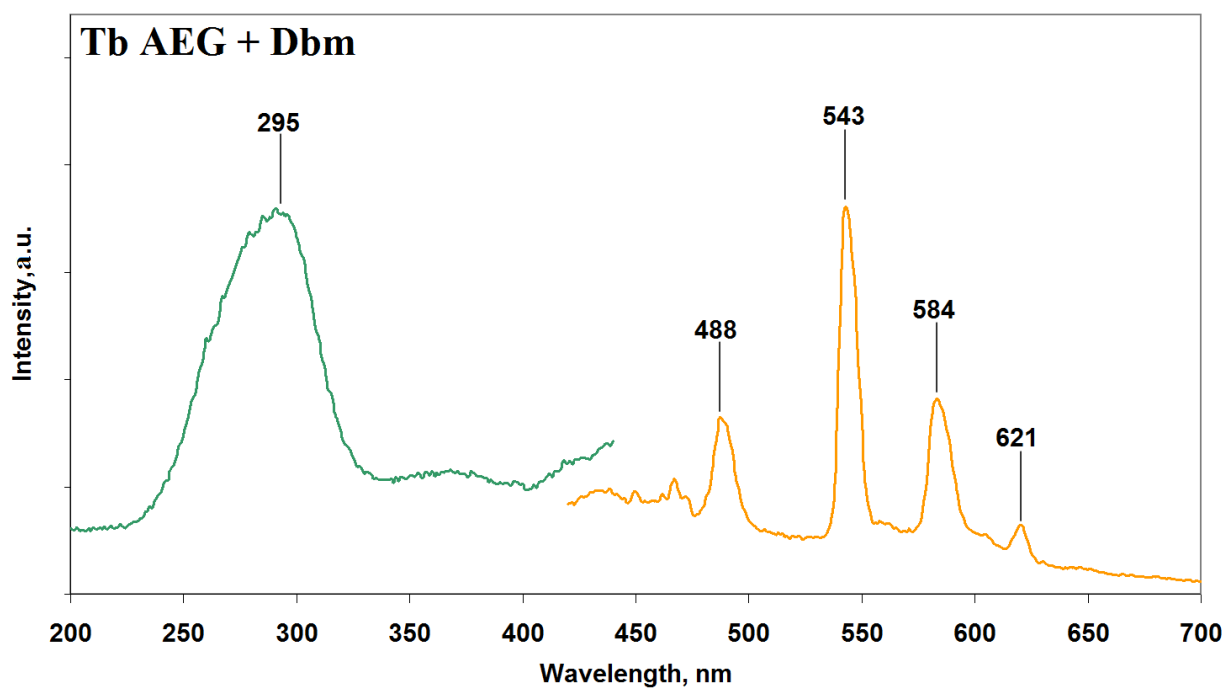

Figure S14. Luminescence (orange curve) and luminescence excitation (green curve) spectra of alginate aerogels crosslinked with  $\text{Tb}^{3+}$  ions, SC-impregnated with Dbm ligands.

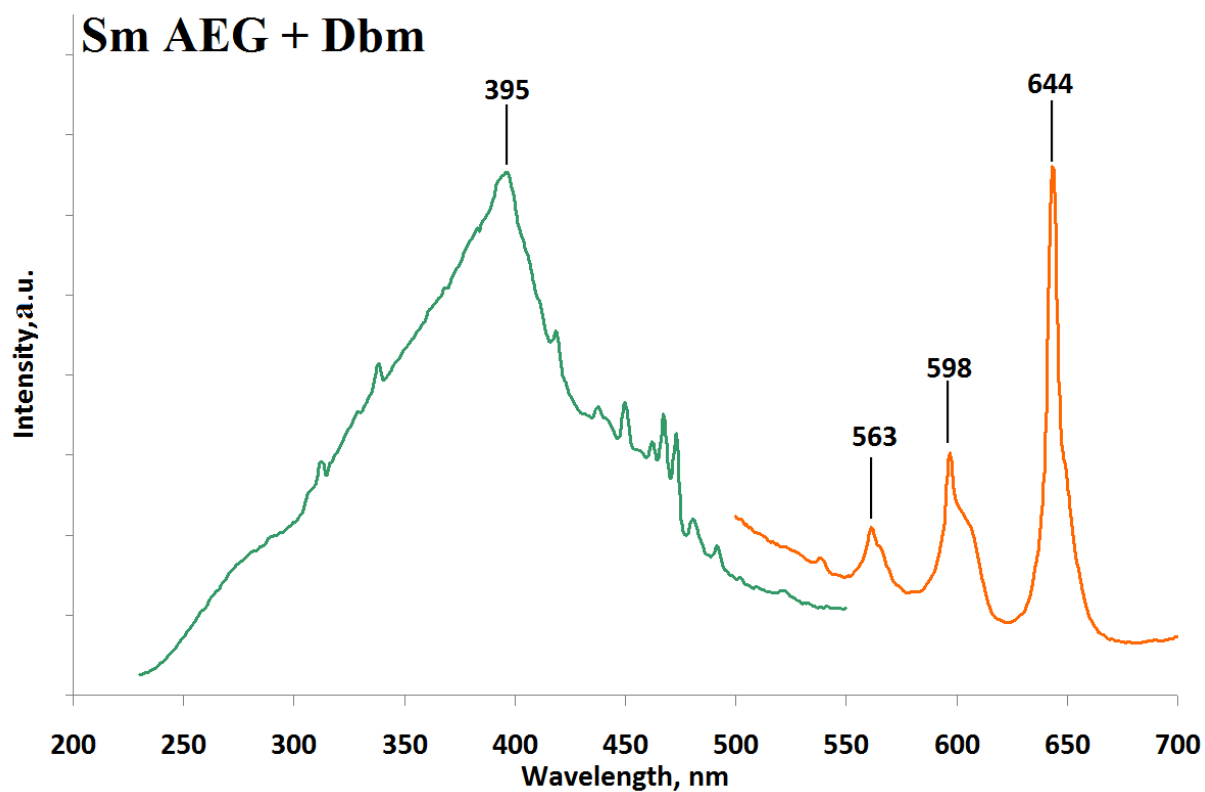

Figure S15. Luminescence (orange curve) and luminescence excitation (green curve) spectra of alginate aerogels crosslinked with  $\text{Sm}^{3+}$  ions, SC-impregnated with Dbm ligands.

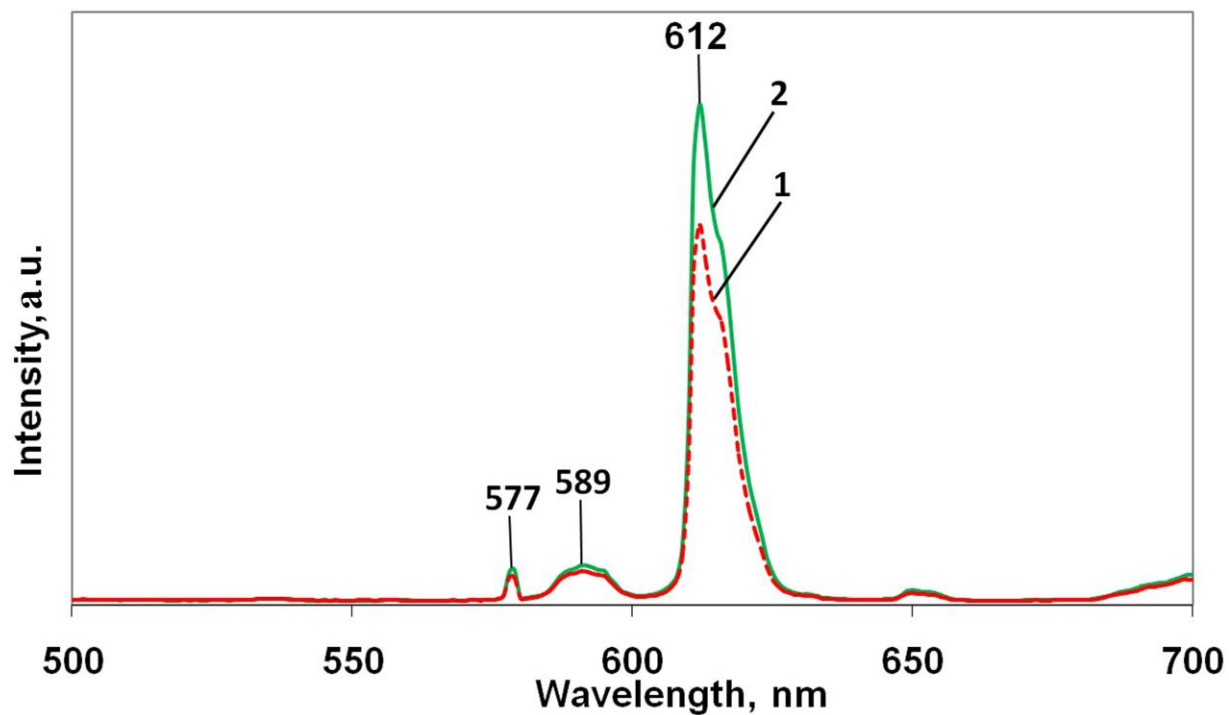

Figure S16. Luminescence spectra: 1 – AEG Eu SC-impregnated with Tta before and 2 – after exposure to acetone vapor.



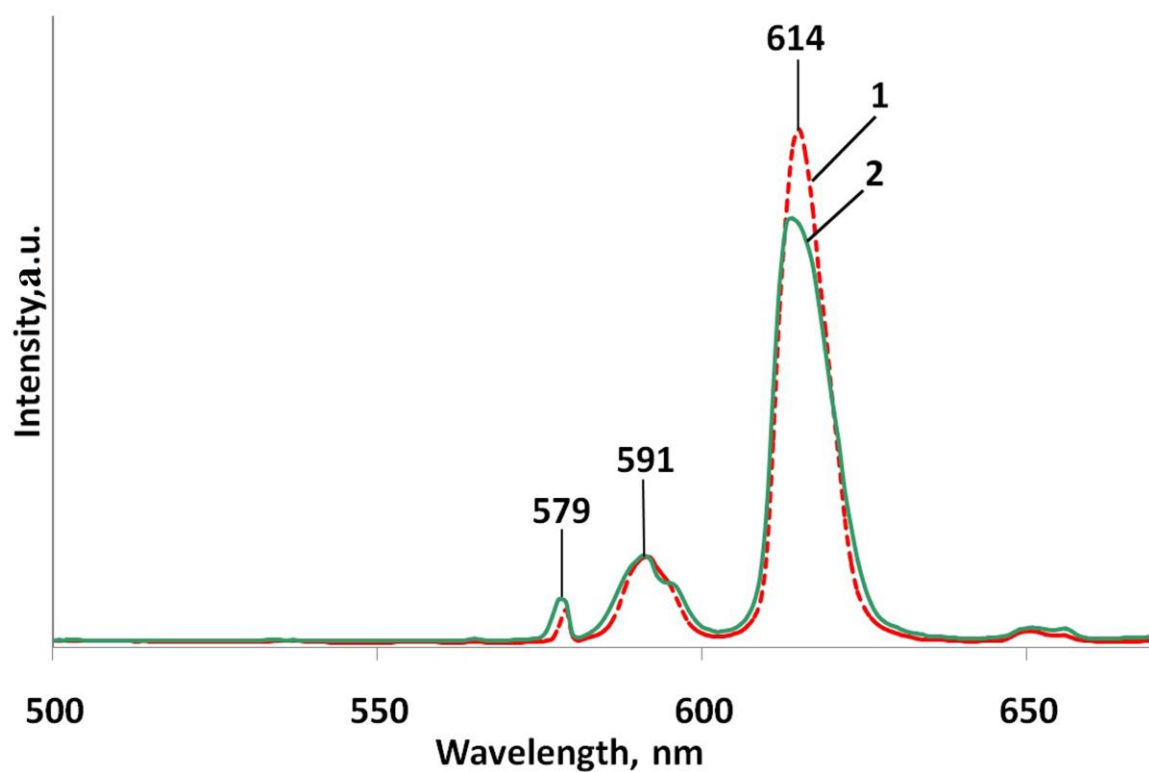

Figure S17. Luminescence spectra: 1 – AEG Eu SC-impregnated with Phen before and 2 – after exposure to ammonia vapor.

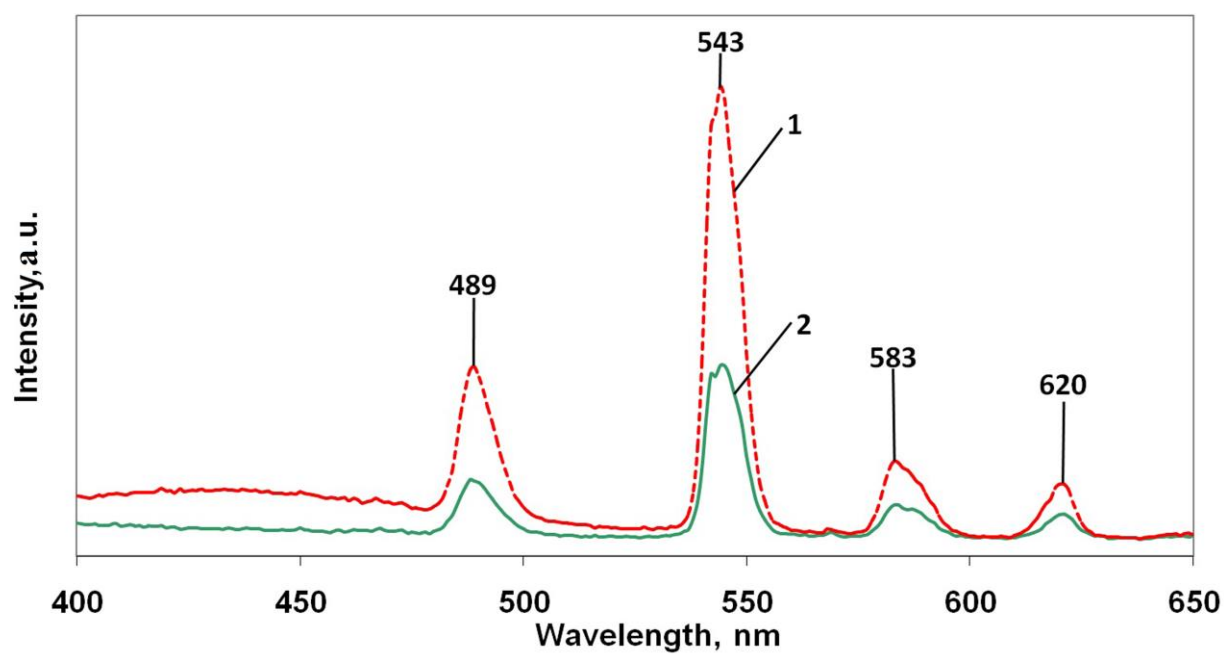

Figure S18. Luminescence spectra: 1 – AEG Tb SC-impregnated with Phen before and 2 – after exposure to ammonia vapor.
